# Supplementary material for: Metabolomic identification of biochemical changes induced by fluoxetine and imipramine in a chronic mild stress mouse model of depression
Source: PubMed Central journal article supplement (PMC4352870; doi:10.1038/srep08890), 2015-03-09
Supplement: srep08890-s1.pdf [file srep08890-s1.pdf]

1 Metabolomic identification of biochemical changes induced by fluoxetine and  
2 imipramine in a chronic mild stress mouse model of depression

3

4 Jing Zhao <sup>a</sup>, Yang-Hee Jung <sup>a</sup>, Choon-Gon Jang <sup>a</sup>, Kwang-Hoon Chun <sup>b</sup>, Sung Won Kwon <sup>c</sup>, Jeongmi Lee <sup>a,\*</sup>

5

6

7

## 8 **Figure legends**

9 **Supplementary Fig. S1.** Measurement of body weight at day 0 (a), day 7 (b), day 14 (c), day 21 (d), and day 27  
10 of CMS application. \* indicates  $p < 0.05$ , \*\* indicates  $p < 0.01$ , and \*\*\* indicates  $p < 0.001$ . Fluoxetine or  
11 imipramine was administered from day 15 of CMS application.

12 **Supplementary Fig. S2.** Representative GC-MS chromatograms from the metabolome analysis of control (a),  
13 Cms (b), Flu (c), and Imi (d) groups. Peak identification for potential markers: 1, glycine; 2, N-carboxy-glycine;  
14 3, valine; 4, urea; 5, leucine; 6, phosphoric acid; 7, unidentified; 8, malic acid; 9, aspartic acid; 10, unidentified;  
15 11, creatinine; 12, glutamic acid; 13 NAA; 14, lysine; 15, unidentified; 16, glutamine; 17, unidentified; 18,  
16 hexadecanoic acid; 19, myo-inositol; 20, oleic acid; 21, octadecanoic acid; 22, adenosine; 23, Cholesterol.

17 **Supplementary Fig. S3.** PCA score plot for control and quality control (QC) samples.

18 **Supplementary Fig. S4.** S-plots of pair-wise comparison between control and Cms (a), Cms and Flu (b), and  
19 Cms and Imi (c). Differential metabolites as potential markers were marked with red squares.

20 Supplementary Fig. S1.

21 (a)

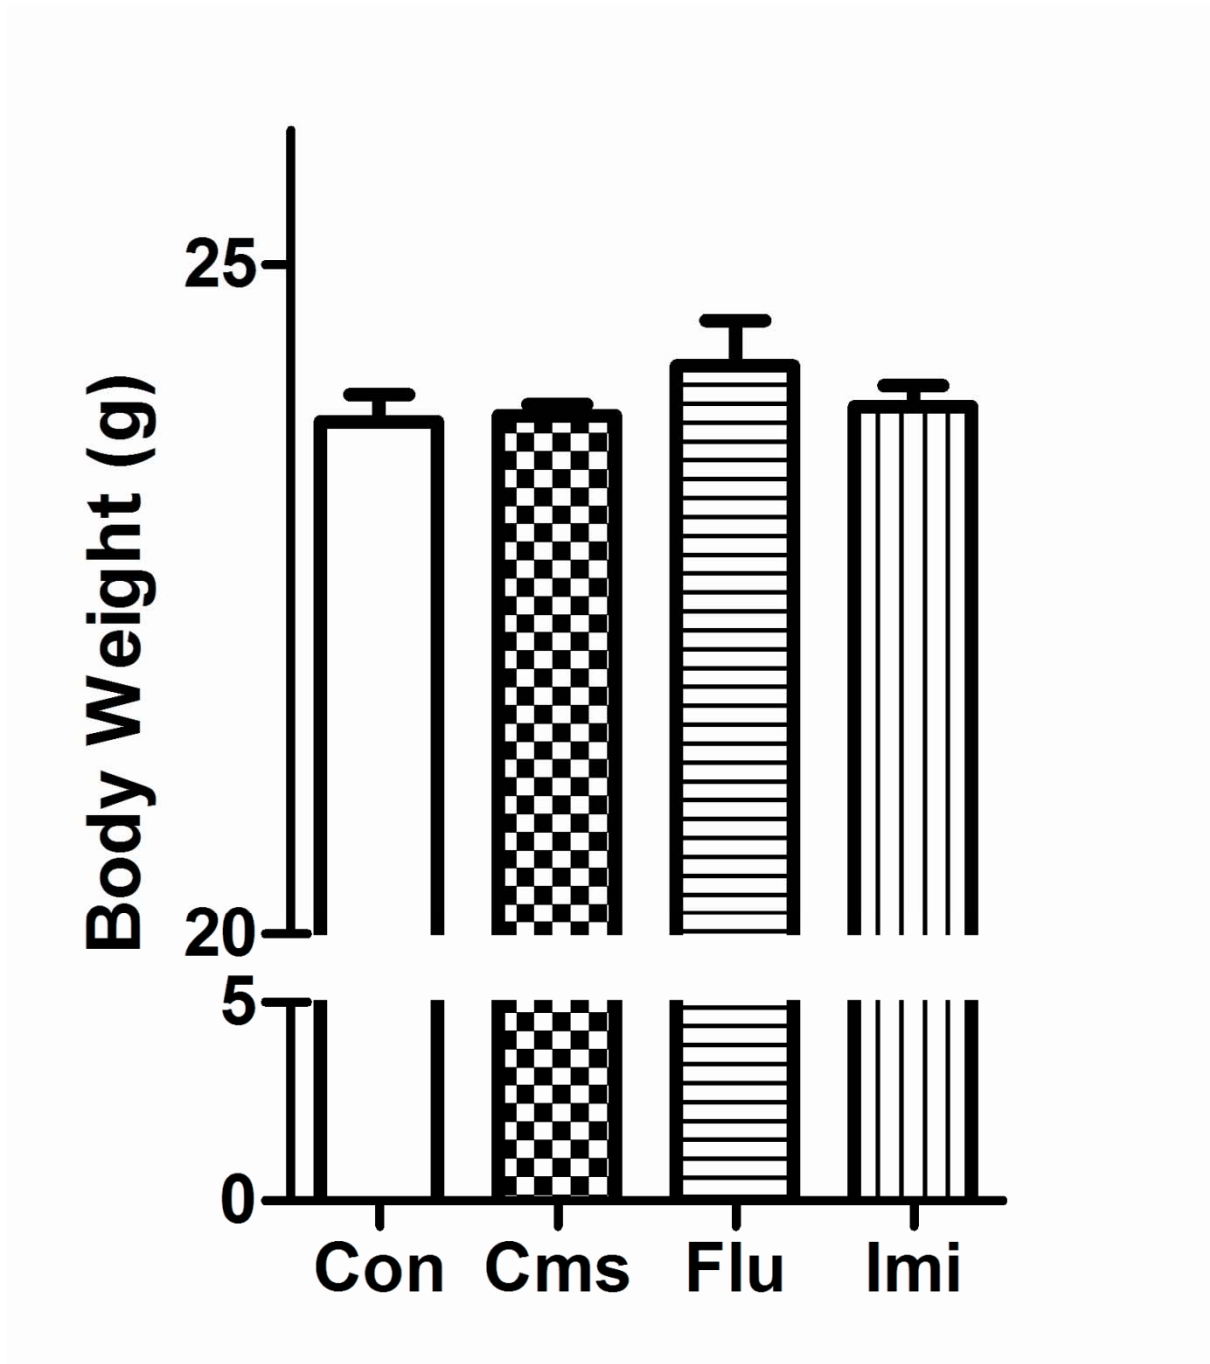

22

23

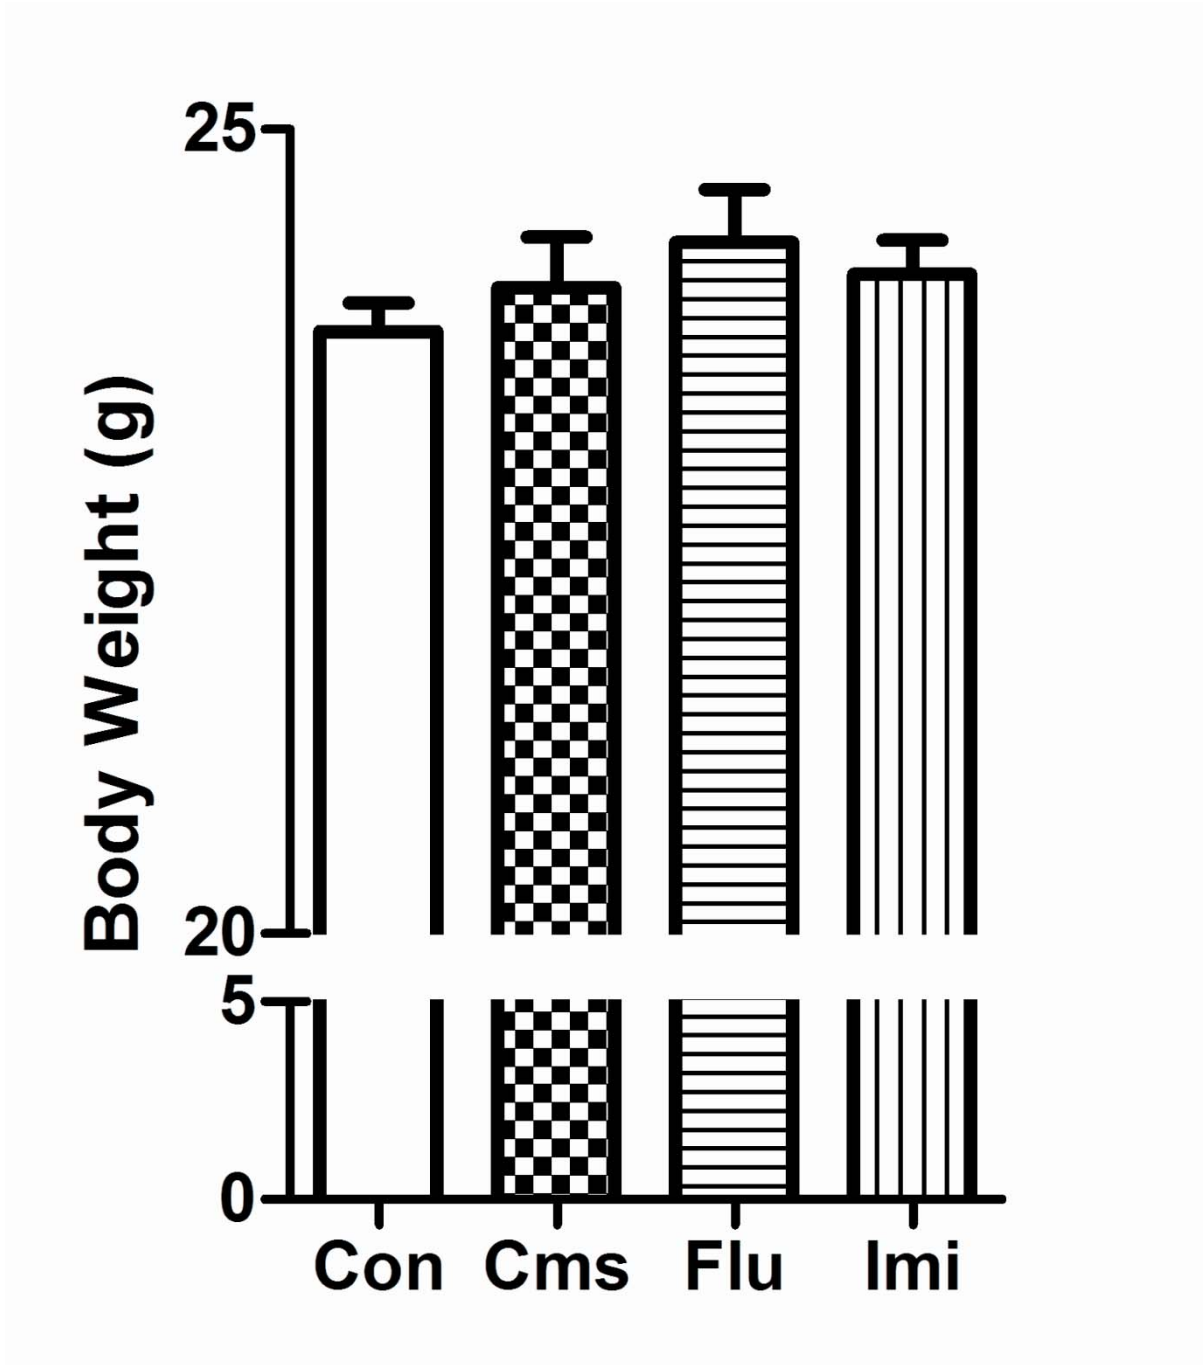

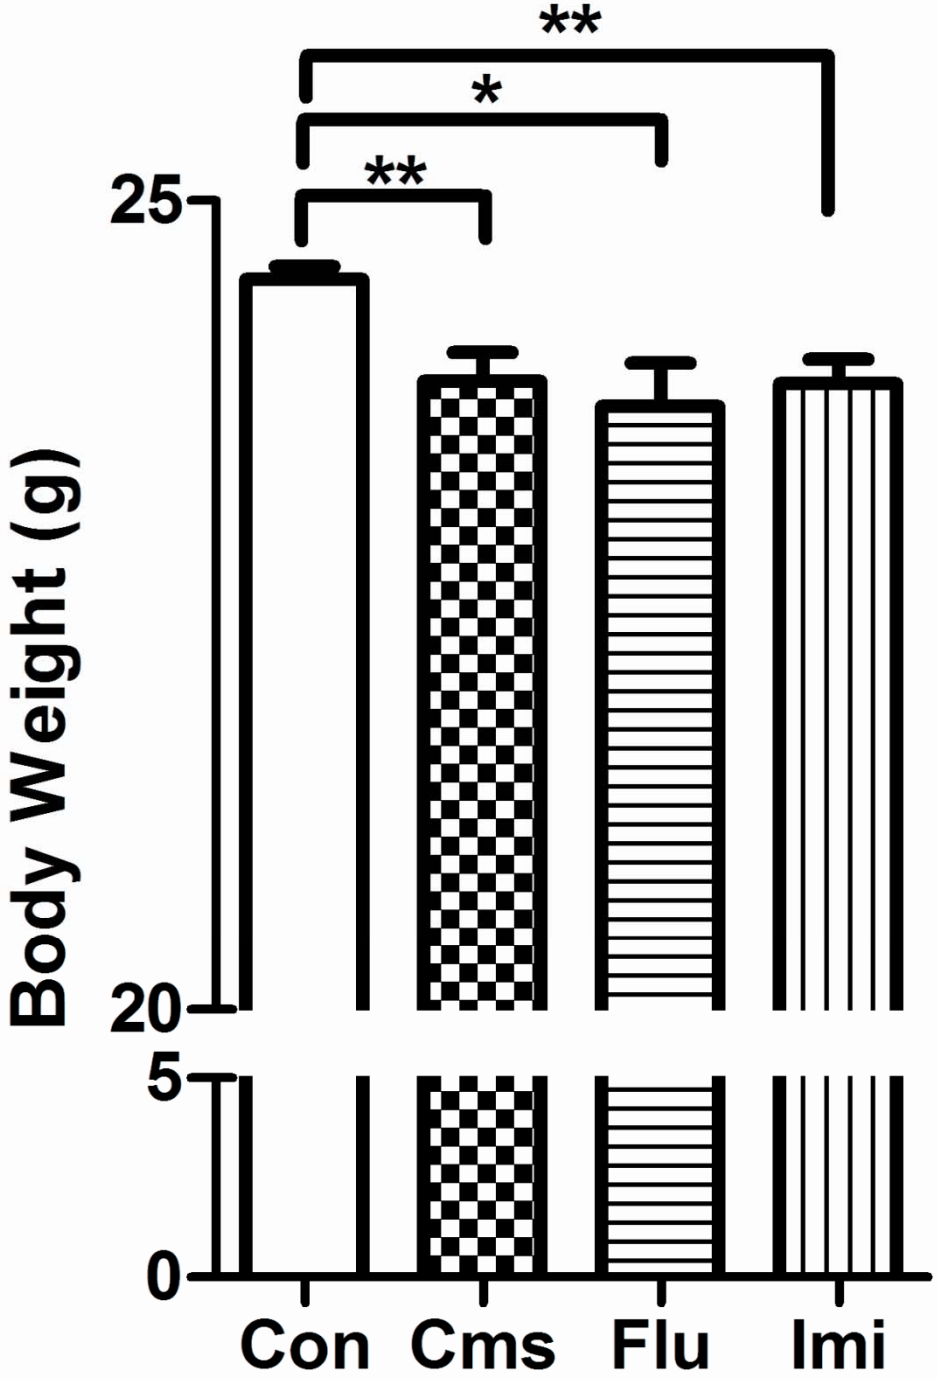

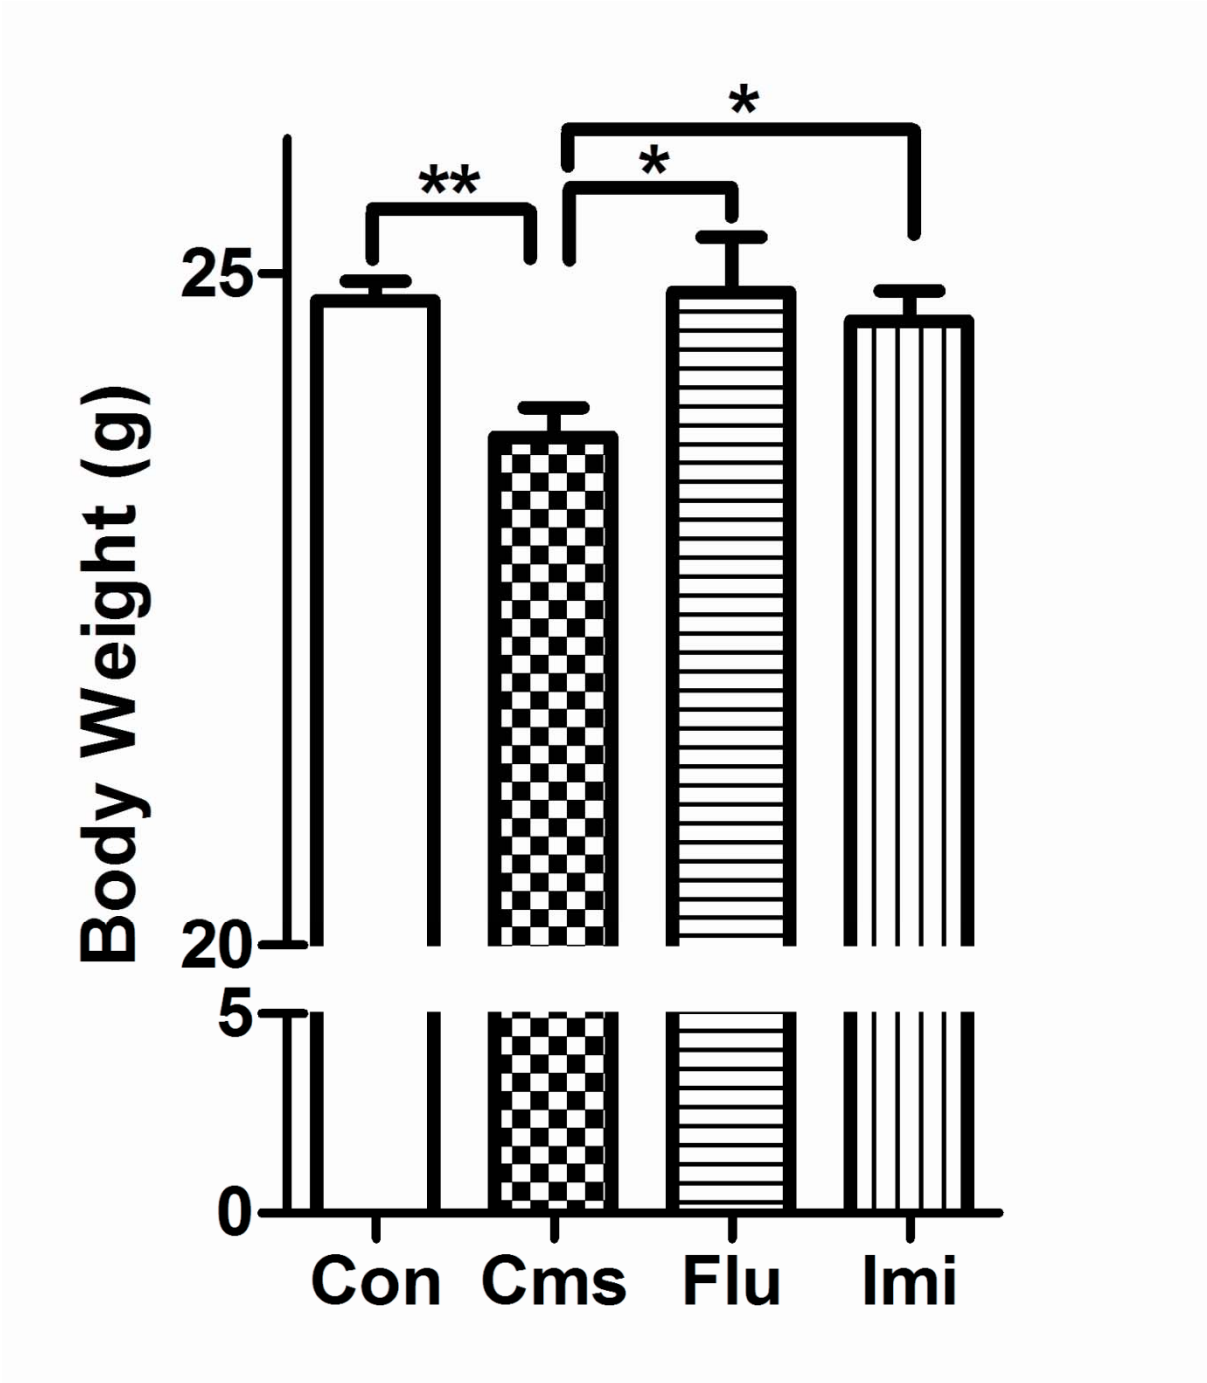

31

32

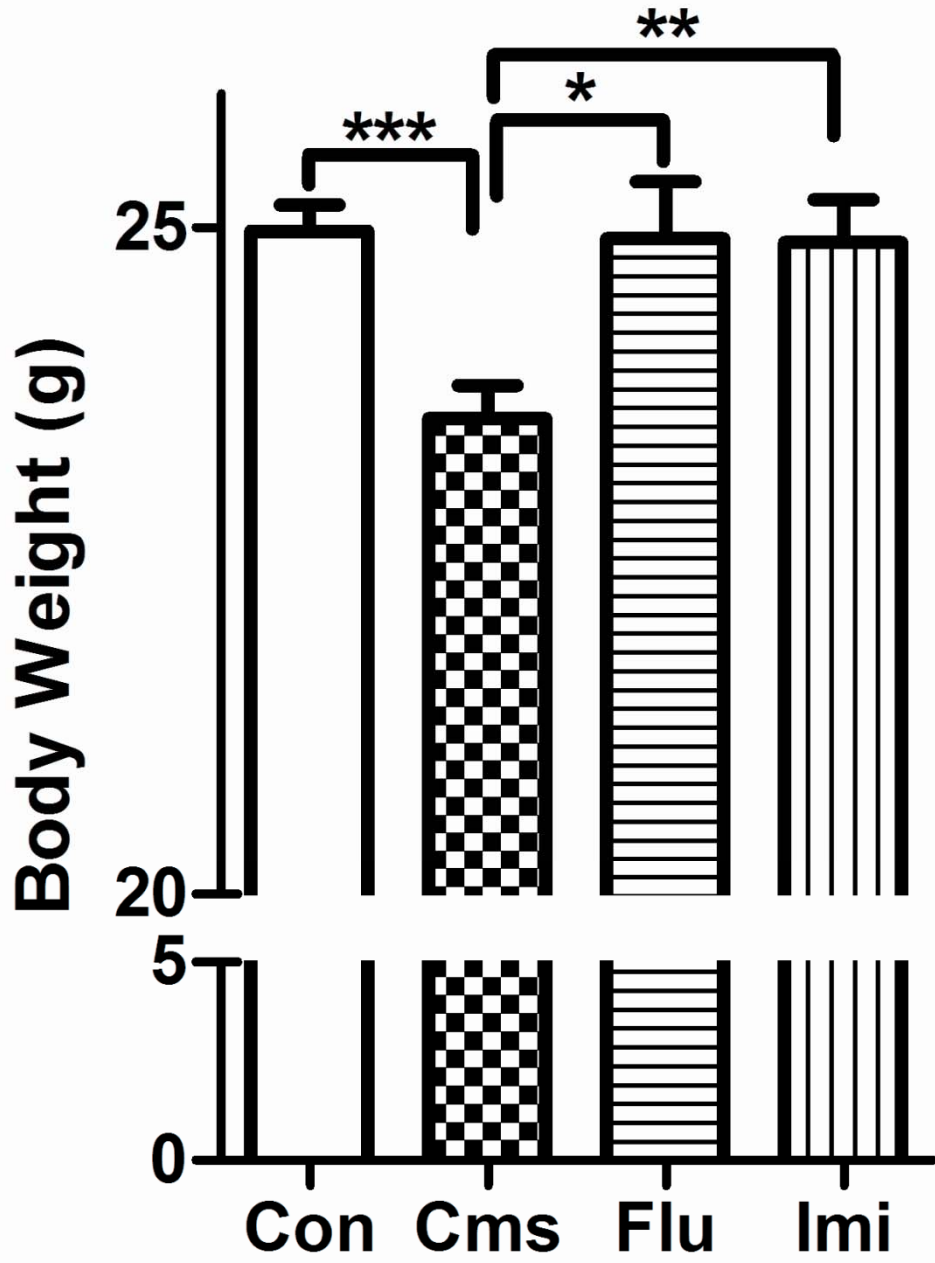

35 **Supplementary Fig. S2.**

36 **(a)**

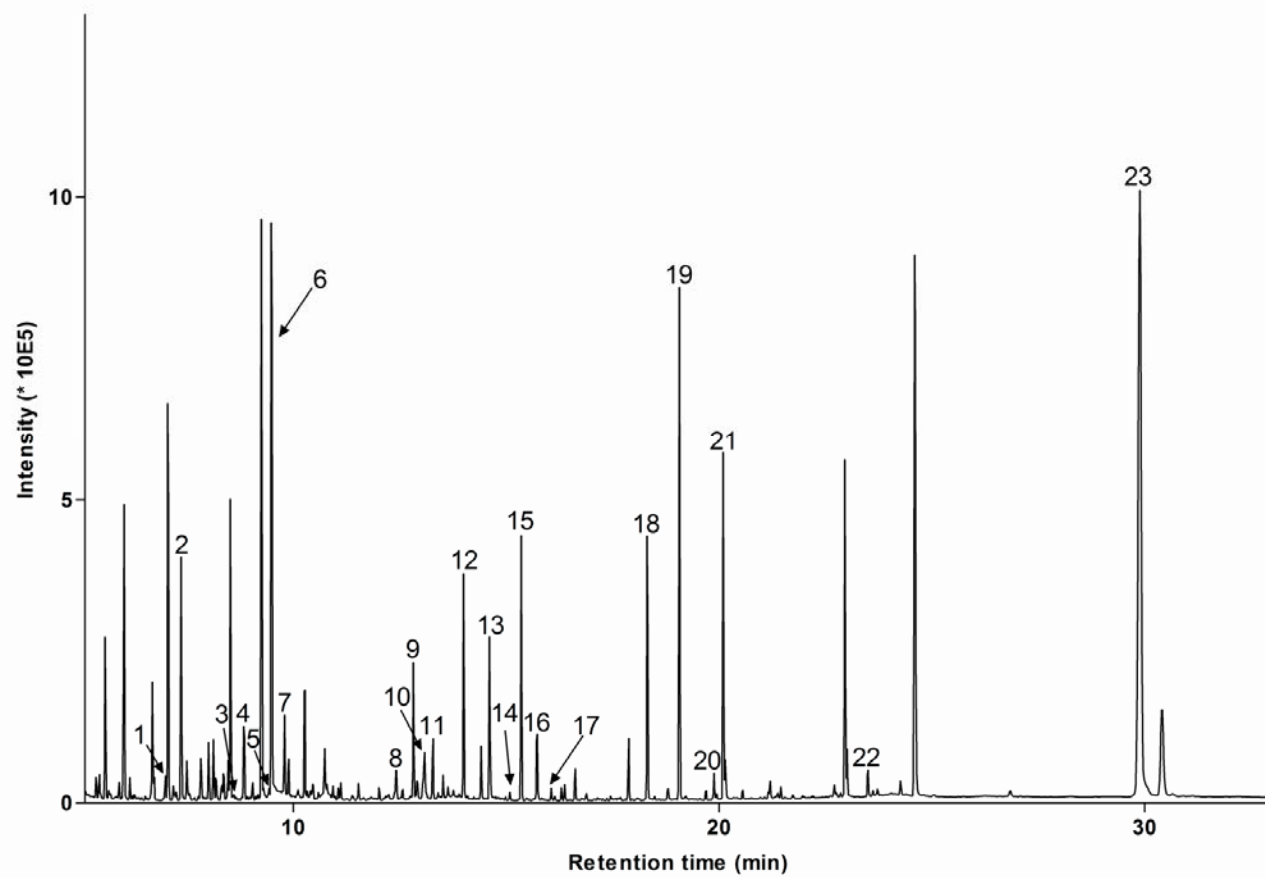

37



38 (b)

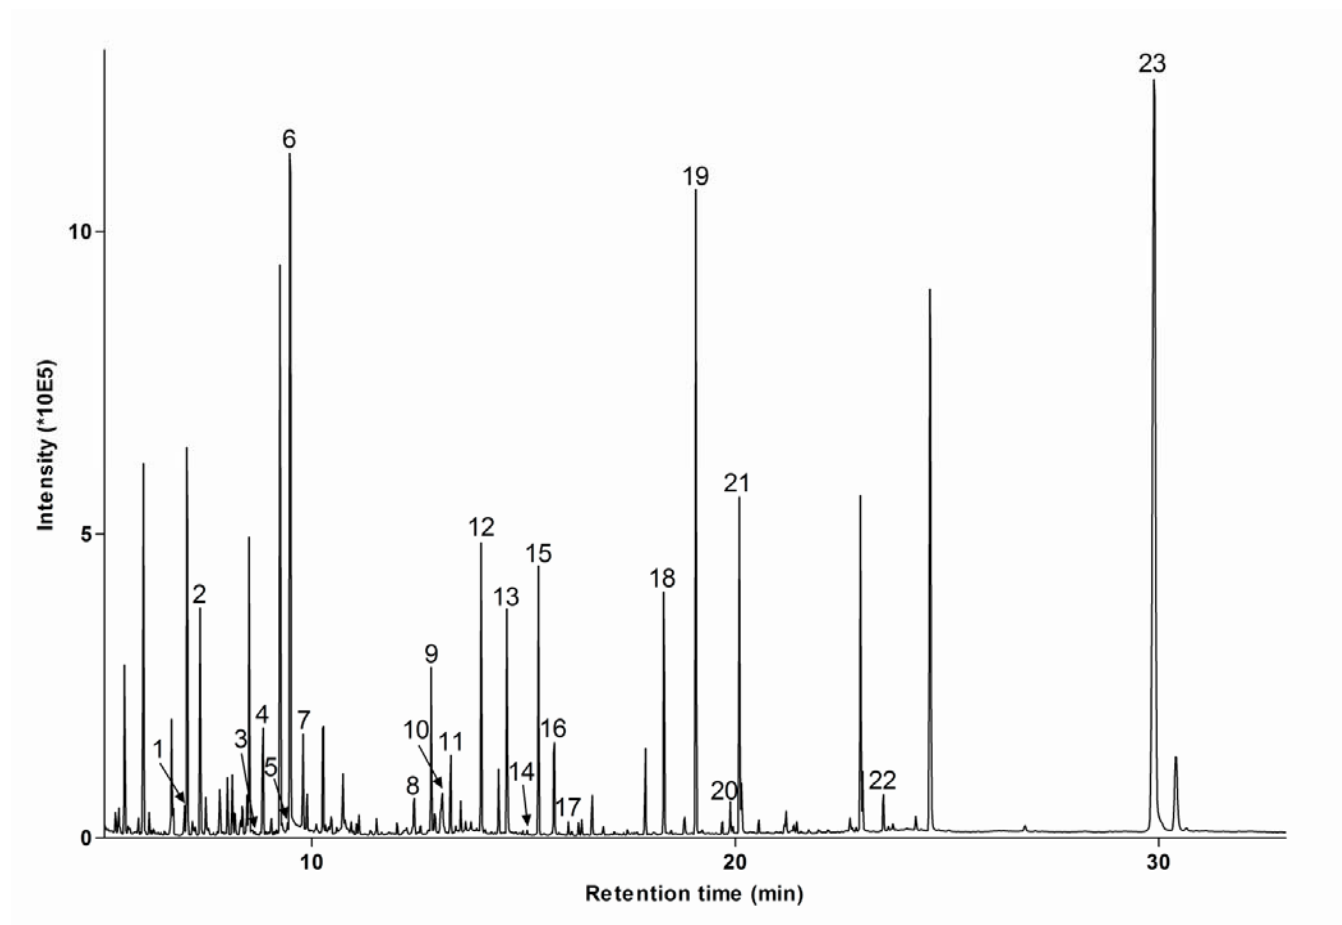

39

40 (c)

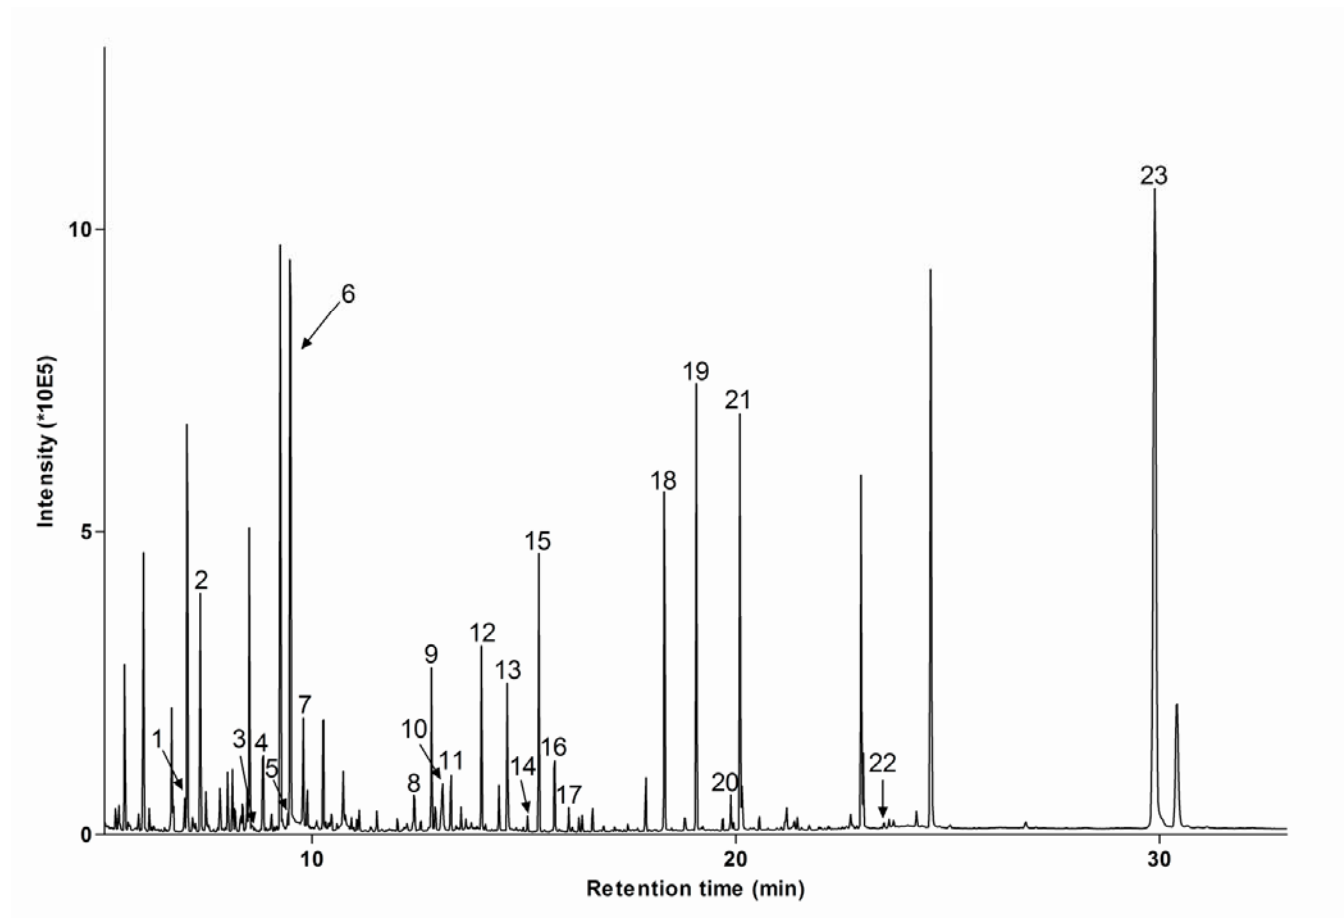

41

42

43 (d)

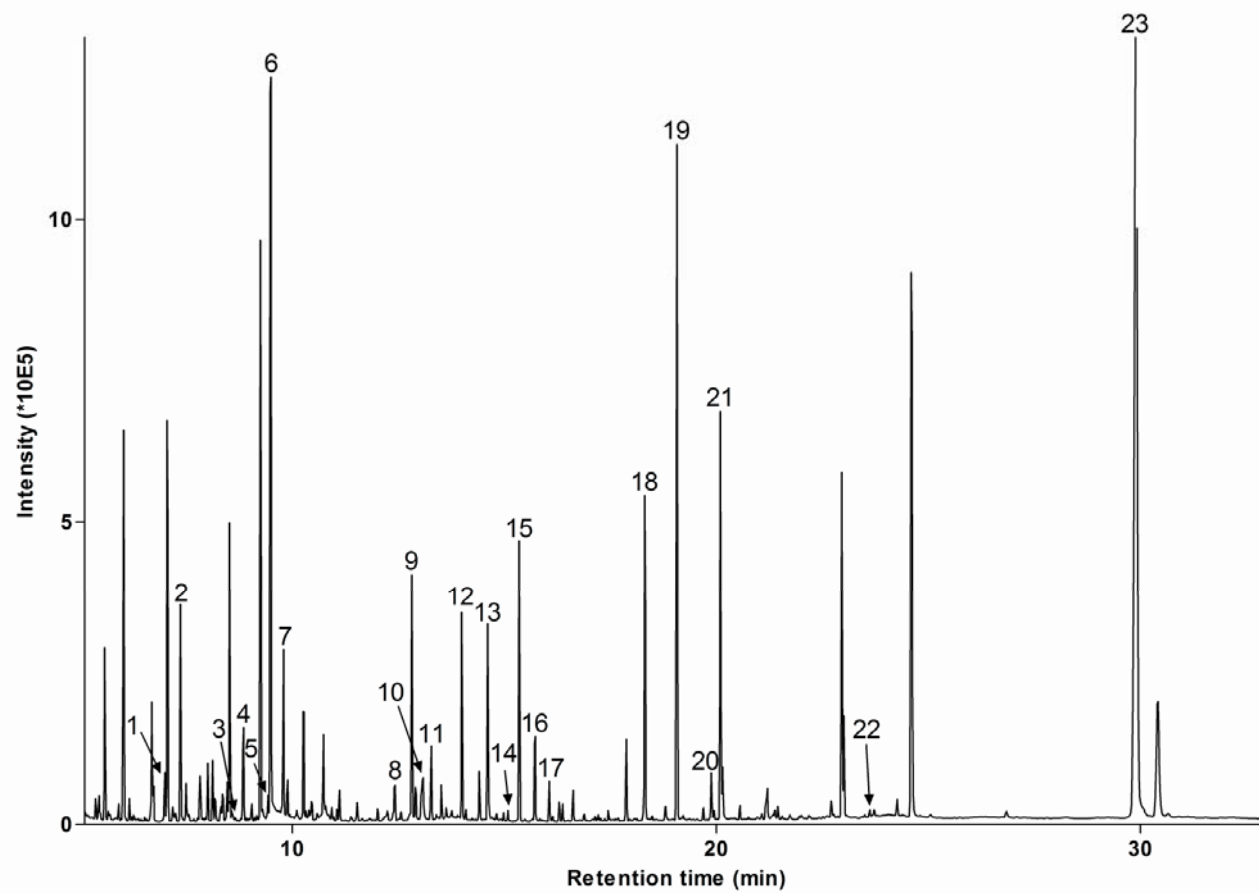

44

45 **Supplementary Fig. S3.**

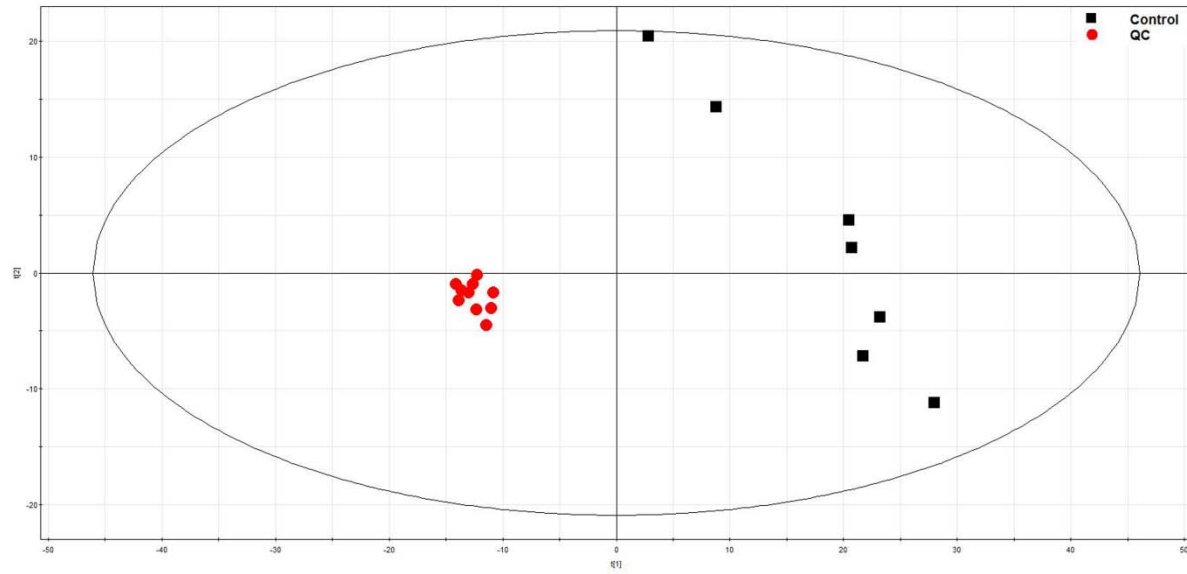

46

47

48 **Supplementary Fig. S4.**

49 **(a)**

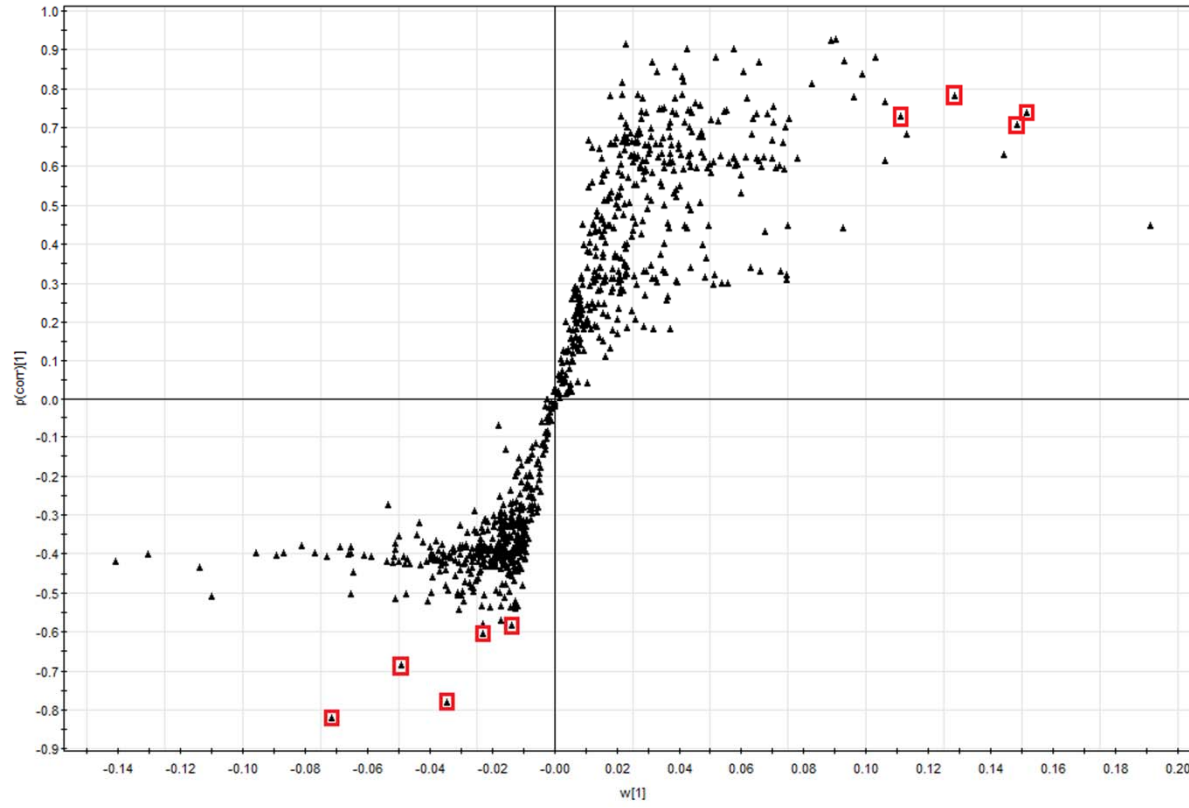

50  
51

52 (b)

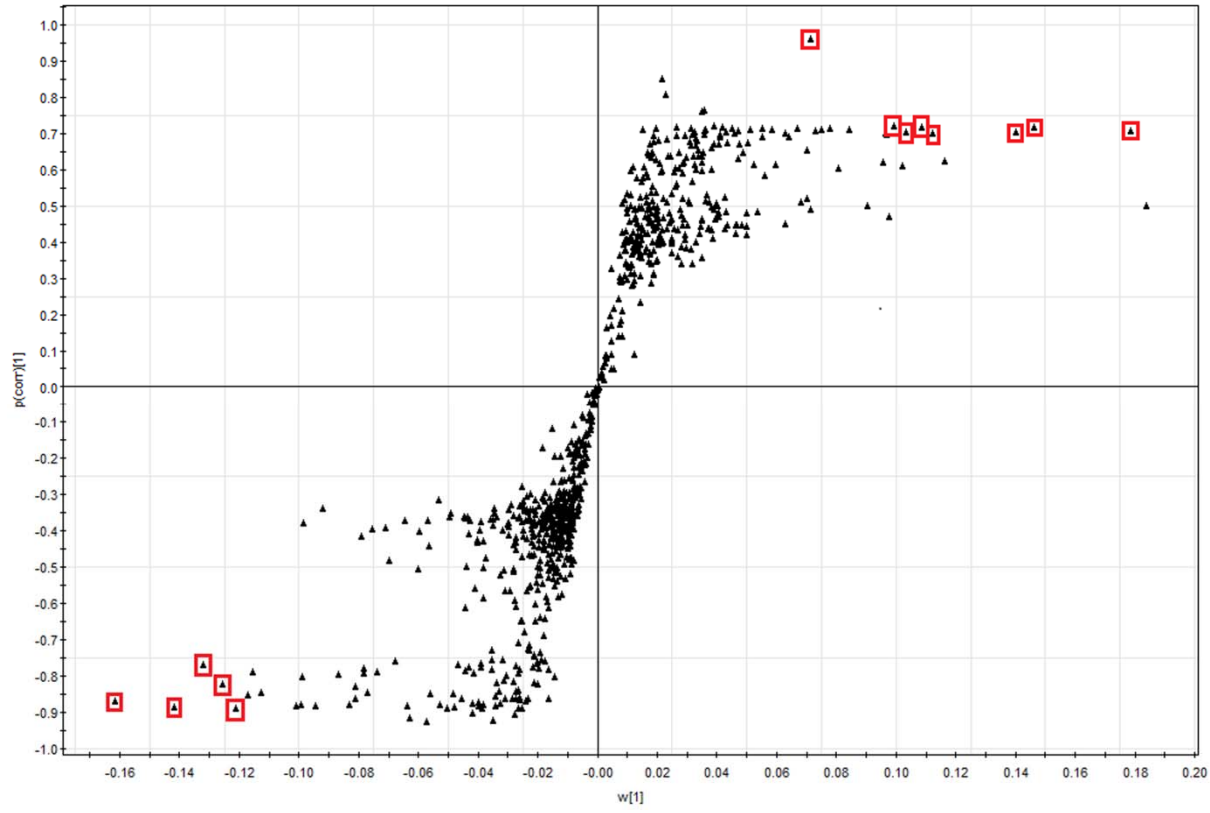

53

54

55 (c)

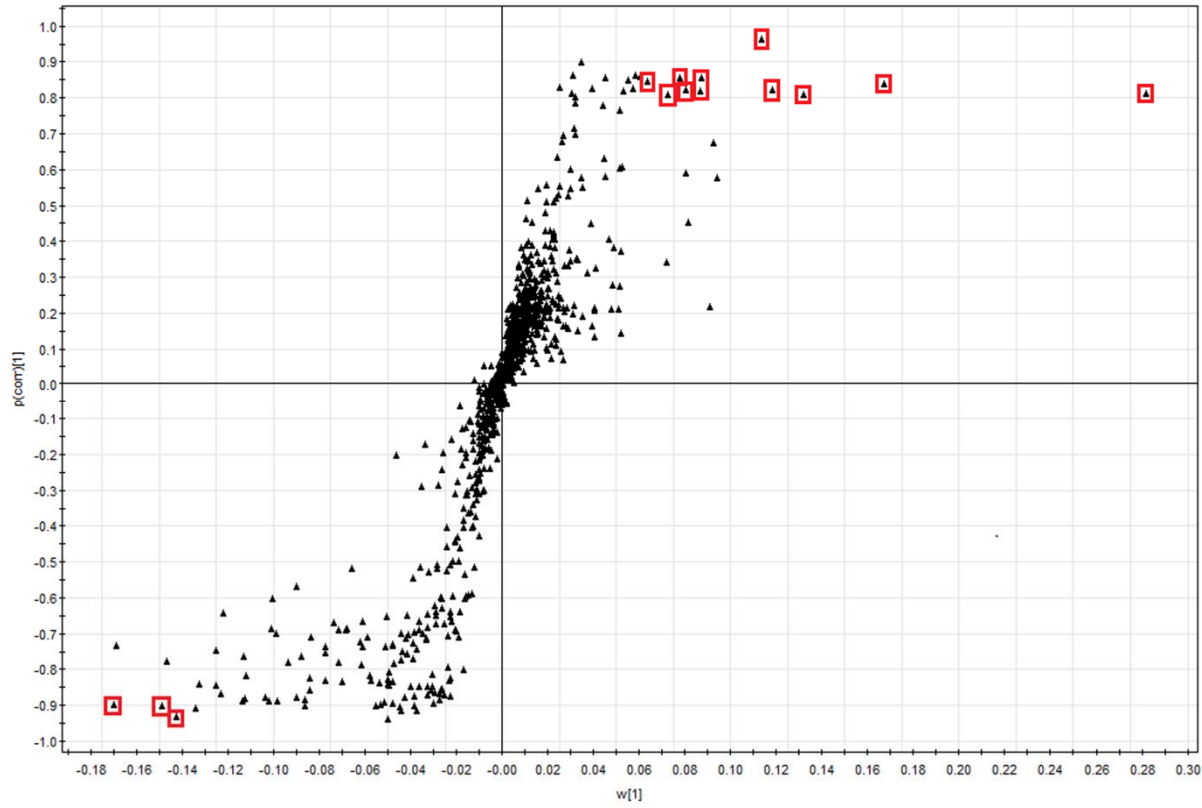

56

57

58 **Supplementary Table S1.** List of identified metabolites in the GC-MS analysis

| No. | t <sub>R</sub> (min) | Identified metabolites             | Mass fragments ( <i>m/z</i> ) | Match factor |
|-----|----------------------|------------------------------------|-------------------------------|--------------|
| 1   | 6.00                 | Propanoic acid <sup>b</sup>        | 73, 117, 147, 190             | 86           |
| 2   | 6.73                 | Alanine <sup>b</sup>               | 73, 116, 147                  | 83           |
| 3   | 7.00                 | Glycine <sup>a</sup>               | 73, 102, 147, 204             | -            |
| 4   | 7.36                 | N-Carboxy-glycine <sup>b</sup>     | 73, 133, 147, 200, 235        | 81           |
| 5   | 8.57                 | Valine <sup>a</sup>                | 73, 144, 218                  | -            |
| 6   | 8.84                 | Urea <sup>a</sup>                  | 73, 147, 171, 189             | -            |
| 7   | 9.43                 | Leucine <sup>a</sup>               | 73, 147, 158                  | -            |
| 8   | 9.48                 | Phosphoric acid <sup>a</sup>       | 73, 299, 314                  | -            |
| 9   | 10.73                | L-Lactic acid <sup>b</sup>         | 73, 147, 204, 218             | 80           |
| 10  | 11.11                | L-Threonine <sup>a</sup>           | 73, 117, 147, 218, 291        | -            |
| 11  | 12.40                | Malic acid <sup>a</sup>            | 73, 147, 233, 335             | -            |
| 12  | 12.42                | Butanedioic acid <sup>b</sup>      | 73, 147, 233, 245             | 81           |
| 13  | 12.82                | Aspartic acid <sup>a</sup>         | 73, 100, 147, 218, 232        | -            |
| 14  | 13.28                | Creatinine <sup>a</sup>            | 73, 115, 147, 256, 314        | -            |
| 15  | 13.99                | Glutamic acid <sup>a</sup>         | 73, 128, 147, 156, 246        | -            |
| 16  | 14.09                | L-Phenylalanine <sup>a</sup>       | 73, 100, 115, 147, 192, 218   | -            |
| 17  | 14.24                | Dodecanoic acid <sup>a</sup>       | 73, 117, 129, 145, 257        | -            |
| 18  | 14.60                | N-Acetylaspartic acid <sup>a</sup> | 73, 147, 274, 326, 376        | -            |
| 19  | 14.98                | Lysine <sup>a</sup>                | 73, 84, 147, 156, 299, 362    | -            |
| 20  | 15.73                | Glutamine <sup>a</sup>             | 73,147, 155, 245, 299, 357    | -            |



|    |       |                                           |                                       |    |
|----|-------|-------------------------------------------|---------------------------------------|----|
| 21 | 15.83 | 1-Naphthalenecarboxylic acid <sup>b</sup> | 57, 127, 151, 185, 229, 244           | 80 |
| 22 | 16.29 | Citric acid <sup>a</sup>                  | 73, 147, 273, 347, 363, 375           | -  |
| 23 | 16.37 | Tetradecanoic acid <sup>b</sup>           | 73, 117, 131, 145, 285                | 98 |
| 24 | 17.46 | L-Tyrosine <sup>b</sup>                   | 73, 147, 218, 280                     | 89 |
| 25 | 17.88 | L-Altrose <sup>b</sup>                    | 73, 147, 217, 305, 319                | 82 |
| 26 | 18.31 | Hexadecanoic acid <sup>a</sup>            | 55, 73, 117, 132, 145, 313            | -  |
| 27 | 18.80 | Heneicosane <sup>b</sup>                  | 57, 71, 85, 99, 299                   | 98 |
| 28 | 19.07 | Myo-Inositol <sup>a</sup>                 | 73, 147, 191, 204, 217, 265, 305, 318 | -  |
| 29 | 19.22 | Heptadecanoic acid <sup>b</sup>           | 73, 117, 145, 299, 327, 342           | 83 |
| 30 | 19.70 | Docosane <sup>b</sup>                     | 57, 71, 85, 99, 310                   | 99 |
| 31 | 19.88 | Oleic acid <sup>a</sup>                   | 73, 117, 129, 145, 264, 339           | -  |
| 32 | 20.09 | Octadecanoic acid <sup>a</sup>            | 73, 117, 132, 145, 341                | -  |
| 33 | 20.56 | Ticosane <sup>b</sup>                     | 57, 71, 85, 281, 324                  | 95 |
| 34 | 21.39 | Eicosane <sup>b</sup>                     | 57, 71, 85, 99, 281                   | 98 |
| 35 | 21.95 | Myo-Inositol-2-phosphate <sup>b</sup>     | 73, 147, 217, 299, 318, 387           | 88 |
| 36 | 22.22 | Pyrimidine <sup>b</sup>                   | 73, 147, 265, 318, 387                | 86 |
| 37 | 23.50 | Adenosine <sup>a</sup>                    | 73, 217, 230, 245, 340                | -  |
| 38 | 29.88 | Cholesterol <sup>a</sup>                  | 129, 329, 353, 368, 458               | -  |

59 <sup>a</sup> Metabolites were identified by using commercially available standards.

60 <sup>b</sup> Metabolites were identified by comparison with the MS library.

61 **Supplementary Table S2.** List of differential metabolites between experimental group (Cms, Flu, Imi)<sup>a</sup> and control groups.

| t <sub>R</sub> (min) | Metabolite                     | Cms vs. Con |                     |           | Flu vs. Con |                     |           | Imi vs. Con |                     |           |
|----------------------|--------------------------------|-------------|---------------------|-----------|-------------|---------------------|-----------|-------------|---------------------|-----------|
|                      |                                | Fold Change | t-test ( <i>p</i> ) | VIP score | Fold Change | t-test ( <i>p</i> ) | VIP score | Fold Change | t-test ( <i>p</i> ) | VIP score |
| 7.00                 | Glycine <sup>b</sup>           |             |                     |           |             |                     |           | 1.77        | <0.001              | 2.16      |
| 7.36                 | N-Carboxyglycine <sup>c</sup>  | 0.84        | 0.021               | 1.05      |             |                     |           |             |                     |           |
| 8.57                 | Valine <sup>b</sup>            |             |                     |           | 1.69        | <0.001              | 1.55      | 1.47        | <0.001              | 1.44      |
| 8.84                 | Urea <sup>b</sup>              | 1.25        | 0.001               | 2.43      |             |                     |           |             |                     |           |
| 9.43                 | Leucine <sup>b</sup>           |             |                     |           | 2.28        | <0.001              | 2.40      | 3.13        | <0.001              | 2.41      |
| 9.48                 | Phosphoric acid <sup>b</sup>   | 1.13        | 0.013               | 1.51      |             |                     |           | 1.20        | 0.001               | 2.14      |
| 9.79                 | ?? <sup>d</sup>                |             |                     |           | 1.54        | <0.001              | 2.15      | 2.29        | <0.001              | 2.20      |
| 12.82                | Aspartic acid <sup>b</sup>     |             |                     |           |             |                     |           | 1.68        | <0.001              | 1.61      |
| 13.08                | ??                             | 0.77        | 0.017               | 1.95      |             |                     |           |             |                     |           |
| 15.08                | ??                             | 0.58        | <0.001              | 1.47      | 3.28        | <0.001              | 1.25      |             |                     |           |
| 15.73                | Glutamine <sup>b</sup>         | 1.30        | 0.008               | 1.37      |             |                     |           |             |                     |           |
| 16.06                | ??                             |             |                     |           | 1.87        | <0.001              | 2.46      | 2.86        | <0.001              | 2.44      |
| 18.31                | Hexadecanoic acid <sup>b</sup> | 0.81        | 0.012               | 2.69      |             |                     |           |             |                     |           |
| 20.09                | Octadecanoic acid <sup>b</sup> | 0.85        | 0.041               | 2.00      |             |                     |           |             |                     |           |
| 23.50                | Adenosine <sup>b</sup>         |             |                     |           |             |                     |           | 0.06        | <0.001              | 2.38      |
| 29.88                | Cholesterol <sup>b</sup>       | 1.16        | 0.011               | 1.16      |             |                     |           | 1.26        | <0.001              | 1.34      |

62 <sup>a</sup> Cms, CMS model group; Flu, fluoxetine-treated group; Imi, imipramine-treated group.

63 <sup>b</sup> Metabolites were identified by using commercially available standards.

64 <sup>c</sup> Metabolites were identified by comparison with the MS library.

65 <sup>d</sup> Metabolites were not identified.

66
